# Supplementary material for: Development of a National Aboriginal and Torres Strait Islander Cancer Framework: A Shared Process to Guide Effective Policy and Practice
Source: MDPI journal article supplement (doi:10.3390/ijerph15050942), 2018-05-09

## Supplementary Materials

**Table 1: Stakeholder contributions and functions in consultation process**

| Stakeholder category                                                               | Stakeholder groups                                                                                                                                                                                                                                                                                                                                                                                                                                                                                        | Contribution /role                                                                                                                                                                                                                                                                                                                                                                                                                                                                                                                                 |
|------------------------------------------------------------------------------------|-----------------------------------------------------------------------------------------------------------------------------------------------------------------------------------------------------------------------------------------------------------------------------------------------------------------------------------------------------------------------------------------------------------------------------------------------------------------------------------------------------------|----------------------------------------------------------------------------------------------------------------------------------------------------------------------------------------------------------------------------------------------------------------------------------------------------------------------------------------------------------------------------------------------------------------------------------------------------------------------------------------------------------------------------------------------------|
| Indigenous people affected by cancer/<br>cancer control                            | Cancer survivors, their families, communities, carers, advocates, support groups                                                                                                                                                                                                                                                                                                                                                                                                                          | <ul style="list-style-type: none"> <li>• Right to be involved in development of policies and programs that affect them</li> <li>• Including the lived experience of people affected by cancer - vitally important to ensuring development of a robust and effective Framework</li> <li>• Consumer view of where change needs to occur</li> <li>• Personal stories that help others understand the patient experience and may help drive action</li> <li>• Understanding of community-level conditions and what might be feasible or not</li> </ul> |
| Those with formal responsibilities in relation to Indigenous cancer control        | Cancer Australia, Australian Department of Health, State/territory health departments, Cancer councils, Cancer centres, Screening services, Australian Institute of Health and Welfare Regulators, legislators                                                                                                                                                                                                                                                                                            | <ul style="list-style-type: none"> <li>• Understanding the formal responsibilities and roles in the cancer control landscape</li> <li>• Capacity to block or facilitate change</li> <li>• Capacity to garner resources</li> <li>• Important that these stakeholders recognise their responsibilities and are inspired to support change</li> </ul>                                                                                                                                                                                                 |
| Those with expert/<br>experiential knowledge relevant to Indigenous cancer control | Health care professionals providing care to Indigenous people affected by cancer, Those involved in providing supportive services to Indigenous people affected by cancer<br>Those who are involved in promoting healthy lifestyles (including tobacco control programs, healthy eating and exercise), Researchers , Indigenous primary health care providers, People with expertise in bringing about change in health systems, improvements in practice and behaviour change, Palliative care providers | <ul style="list-style-type: none"> <li>• Important to ensuring development of a robust and effective Framework</li> <li>• Likely to be involved in implementing the Framework</li> </ul>                                                                                                                                                                                                                                                                                                                                                           |
| Those likely to influence                                                          | Champions of any sort, Health care                                                                                                                                                                                                                                                                                                                                                                                                                                                                        | <ul style="list-style-type: none"> <li>• Buy in for Framework and its implementation</li> </ul>                                                                                                                                                                                                                                                                                                                                                                                                                                                    |

| Stakeholder category                | Stakeholder groups                                                                                                                                                                                                                                                                                                        | Contribution /role                                                                                                                                        |
|-------------------------------------|---------------------------------------------------------------------------------------------------------------------------------------------------------------------------------------------------------------------------------------------------------------------------------------------------------------------------|-----------------------------------------------------------------------------------------------------------------------------------------------------------|
| change in Indigenous cancer control | professionals who are passionate about improving cancer outcomes for Indigenous people, Government health departments, Cancer Australia, Cancer Councils, Cancer advocates, Professional bodies of health professionals who interact with Indigenous people across the cancer continuum, Researchers and research funders | <ul style="list-style-type: none"><li>• Important that these stakeholders recognise the role they might play and are inspired to support change</li></ul> |

**Table 2: Numbers of participants in stakeholder consultations**

| Consultation format      | Total no. of participants# | No. and % Indigenous people | No. and % Indigenous patients, family members and carers |
|--------------------------|----------------------------|-----------------------------|----------------------------------------------------------|
| Six regional forums      | 121                        | 71 (59%)                    | 41 (34%)                                                 |
| National survey          | 326                        | 118 (36%)                   | 43 (13%)                                                 |
| Online discussion boards | 18                         | n/a**                       | n/a**                                                    |

# Participants may have contributed to more than one consultation format

\*\* This information was not collected

**Figure 1: Categories of stakeholders identified to be necessary for robust policy development (adapted from Krick, H. et al. 2005. From Words to Action: The Stakeholder Engagement Manual, AccountAbility, the United Nations Environment Programme, and Stakeholder Research Associates, accessed online at [www.unep.fr](http://www.unep.fr))**

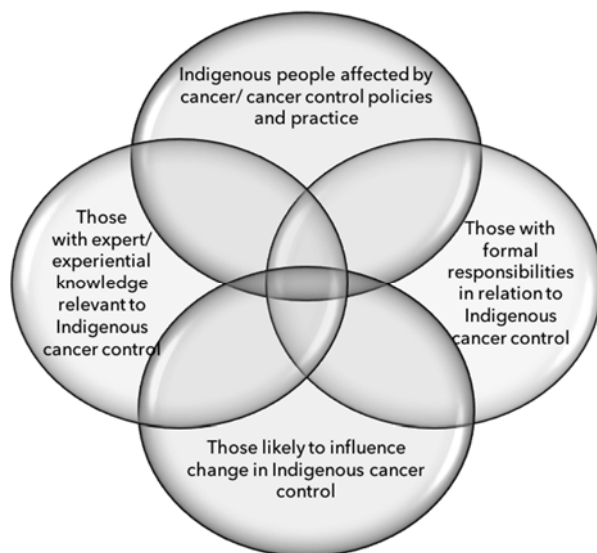

Supplement: s1 [file s1]
